# Supplementary material for: Rapid Detection of Carbendazim Residue in Apple Using Surface-Enhanced Raman Scattering and Coupled Chemometric Algorithm
Source: MDPI journal article supplement (doi:10.3390/foods11091287), 2022-04-28
Supplement: s1 [file s1]

# Supplementary material

## Rapid Detection of Carbendazim Residue in Apple Using Surface-Enhanced Raman Scattering and Coupled Chemometric Algorithm

Huang Xiaowei <sup>1</sup>, Zhang Ning <sup>1</sup>, Li Zhihua <sup>1,\*</sup>, Shi Jiyong <sup>1</sup>, Haroon Elrasheid Tahir <sup>1</sup>, Sun Yue <sup>1</sup>, Zhang Yang <sup>1</sup>, Zhang Xinai <sup>1</sup>, Melvin Holmes <sup>2,3,\*</sup> and Zou Xiaobo <sup>1,3,4</sup>

- <sup>1</sup> School of Agricultural Engineering, School of Food and Biological Engineering, Jiangsu University, 301 Xuefu Rd., Zhenjiang, 212013, China; huangxiaowei@ujs.edu.cn (H.X.); zhangning980409@163.com (Z.N.); shi\_jiyong@ujs.edu.cn (S.J.); haroona28@yahoo.com (H.E.T.); 15236251775@163.com (S.Y.); yangzhang1@ujs.edu.cn (Z.Y.); zhangxinai@mail.ujs.edu.cn (Z.X.); zou\_xiaobo@ujs.edu.cn (Z.X.)
- <sup>2</sup> School of Food Science and Nutrition, University of Leeds, Leeds LS2 9JT, UK
- <sup>3</sup> International Joint Research Laboratory of Intelligent Agriculture and Agri-Products Processing, Jiangsu Education Department, Jiangsu University, Zhenjiang, 212013, China
- <sup>4</sup> Collaborative Innovation Center for Modern Grain Circulation and Safety, College of Food Science and Engineering, Nanjing University of Finance and Economics, 128 North Railway Street, Gulou District, Nanjing 210023, China
- \* Correspondence: lizh@ujs.edu.cn (L.Z.); prcmjh@leeds.ac.uk (M.H.); Tel.: +86-511-88780085 (L.Z.); Fax: +86-511-88780201 (L.Z.)

### Estimation of enhancement factor

To examine the enhancement factor (EF) of prepared SERS substrates, 4-Mercaphenol commonly used SERS molecules were measured. The SERS EF is a quantitative measure of the Raman signal amplification of the analyte. The EF value using the reported protocol. The EF can be calculated by:

$$EF = \frac{I_{SERS} N_{Ref}}{I_{Ref} N_{SERS}} \quad (S1)$$

Where  $N_{SERS}$  and  $N_{Ref}$  are the number of molecules probed on the Ag-NPs @PAN-nanohump array film and on the reference sample, respectively.  $I_{SERS}$  and  $I_{Ref}$  correspond to SERS signal and un-enhanced normal signals intensities, respectively. Herein, a certain volume ( $V_{SERS}$ ) and concentration ( $C_{SERS}$ ) 4-Mercaptophenol ethanol solution was dispersed to an area of  $S_{SERS}$  at the Ag-NPs @PAN-nanohump array film substrate. For non-SERS Raman spectra, a certain volume ( $V_{Ref}$ ) and concentration ( $C_{Ref}$ ) 4-Mercaphenol ethanol solution was dispersed to an area of  $S_{Ref}$  at a clean Si substrate. Both the substrates were dried in the air. Considering the area of laser spot is the same, the foregoing equation thus becomes:

$$EF = \frac{I_{SERS}}{I_{Ref}} \cdot \frac{C_{Ref} V_{Ref}}{C_{SERS} V_{SERS}} \cdot \frac{S_{SERS}}{S_{Ref}} \quad (S2)$$

In this experiment, 2.5 $\mu$ L of 1 $\times 10^{-9}$ M 4-Mercaphenol ethanol solution was dispersed to an area of 36mm<sup>2</sup> for the Ag-NPs @PAN-nanohump array film substrate and 2.5 $\mu$ L of 1 $\times 10^{-3}$ M 4-

Mercapphenol ethanol solution was dispersed to an area of 20mm<sup>2</sup> for the silicon wafer. For the band at 1078cm<sup>-1</sup>, ISERS/IRef was 11107/1815=6.12 There is average enhancement factor for the band at 1078cm<sup>-1</sup> is calculated to be 1.1×10<sup>7</sup>.

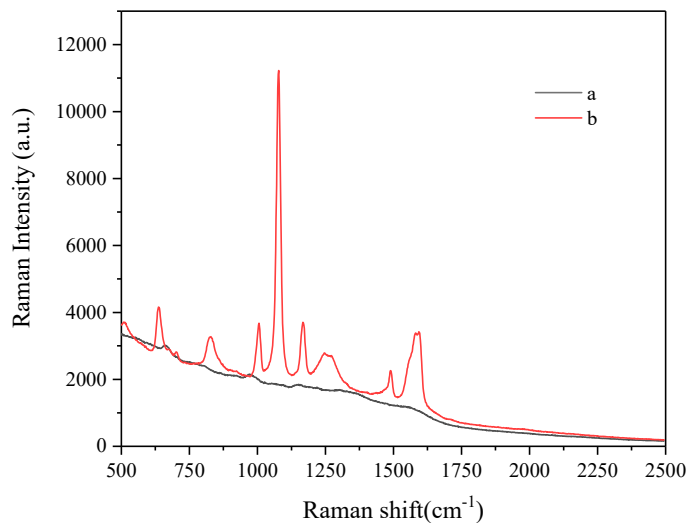

**Figure S1.** (a) SERS spectrum of 2.5μL of 1×10<sup>-6</sup>M 4-Mercapphenol ethanol solution was dispersed to an area of 36 mm<sup>2</sup> for the Ag-NPs @PAN-nano-hump array film. (b). Raman spectrum of 2.5μL of 1×10<sup>-3</sup>M 4-Mercapphenol ethanol solution was dispersed to an area of 20mm<sup>2</sup> for the silicon wafer. The exposure time was 60s.

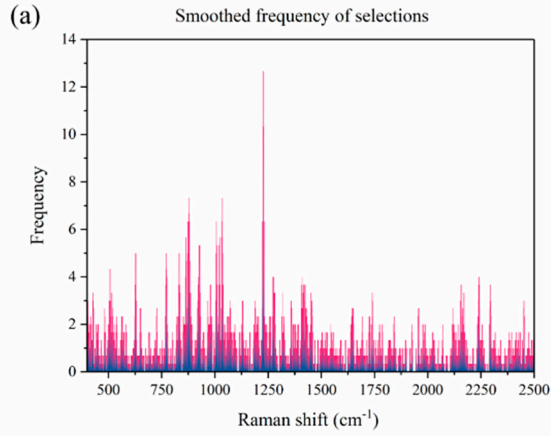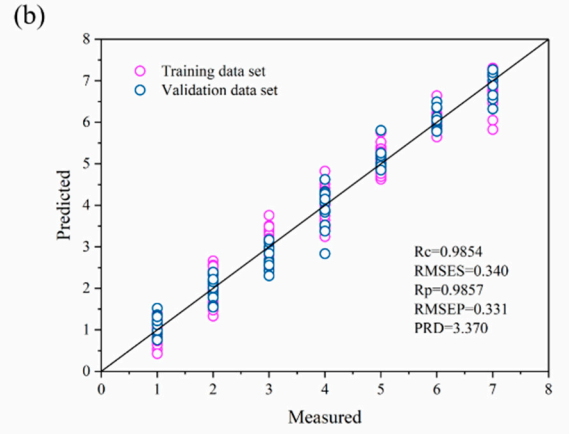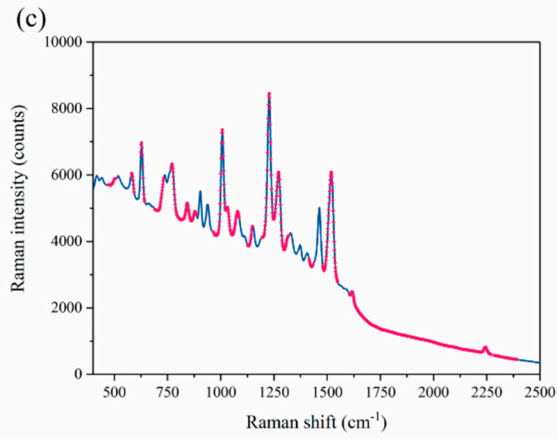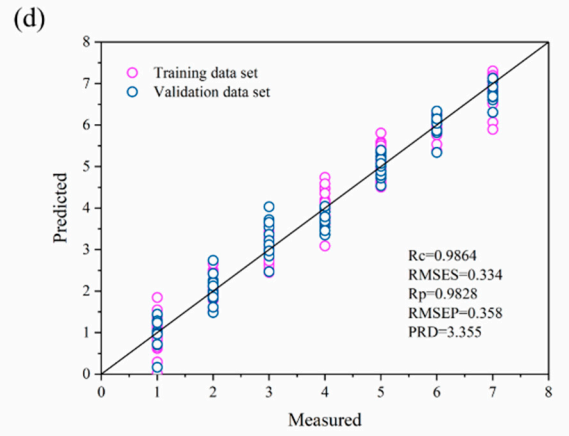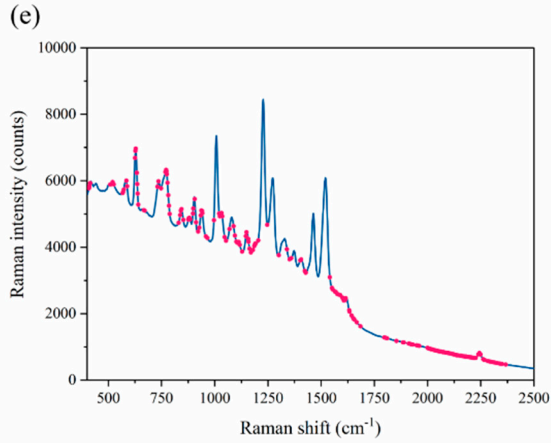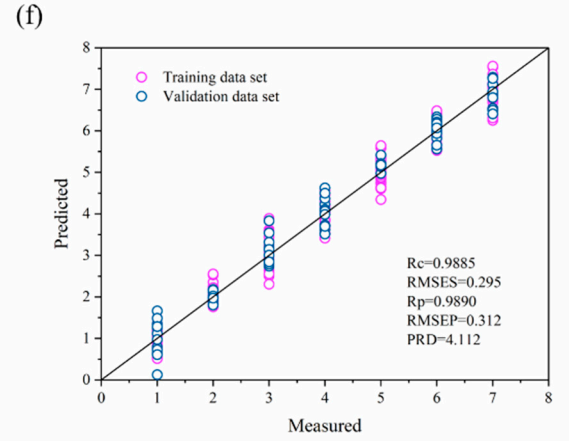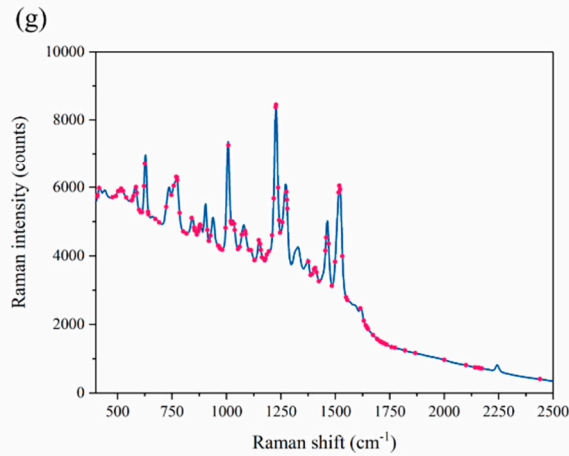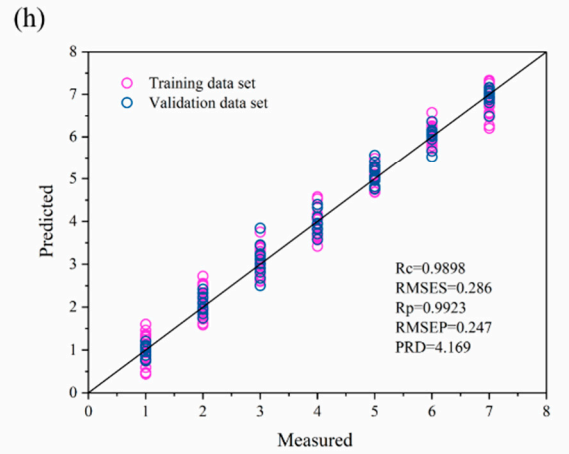

**Figure S2.** (a) the frequency of variable selection after 100 runs by GA; (b) GA-PLS model result ;(c) the distributions of selected variables for the iVISSA-PLS built model; (d)iVISSA-PLS model performance results; (e) spectral variables selected by LASSO algorithm based on preprocessed spectra of Carbendazim; (f) LASSO-PLS model performance results. (g) the distributions of selected variables for the BOSS-PLS built model; (h) BOSS-PLS model results.

### The stability of the system

To examine stability of the method, Ag-NPs @PAN-nanohump array film stored for a certain period was used to detect the carbendazim at concentrations of 0.1, 0.5, 1, 5, 10 mg L<sup>-1</sup>. As displayed in Fig. S3 the detection results of Ag-NPs @PAN-nano-hump array film after different storage days (0, 1, 3, 5, 7, 14 d) remained unchanged, which proved that the prepared Ag-NPs @PAN-nanohump array film has good stability.

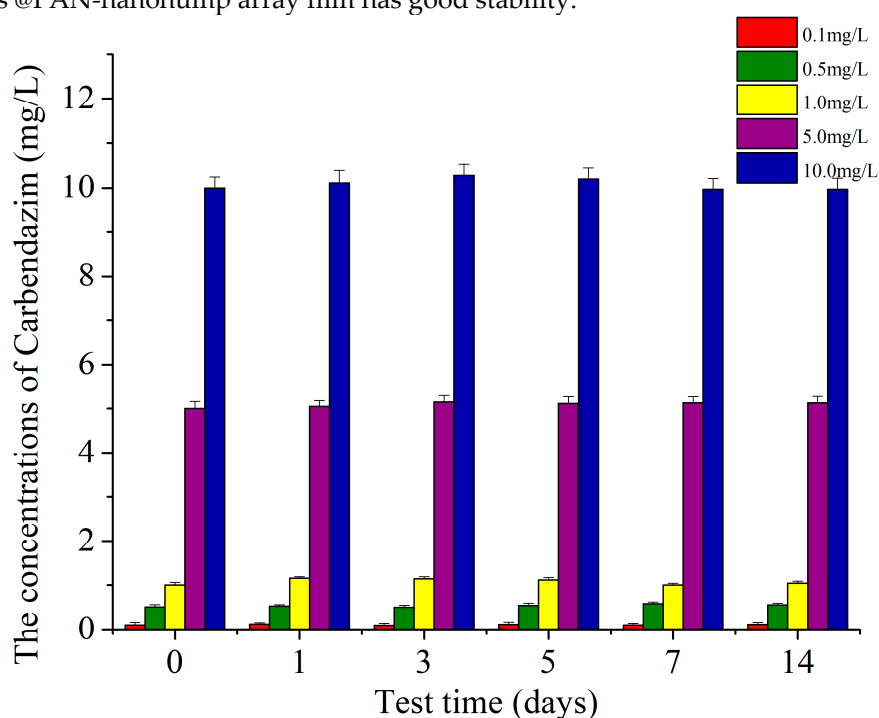

**Figure S3.** The stability of the system.

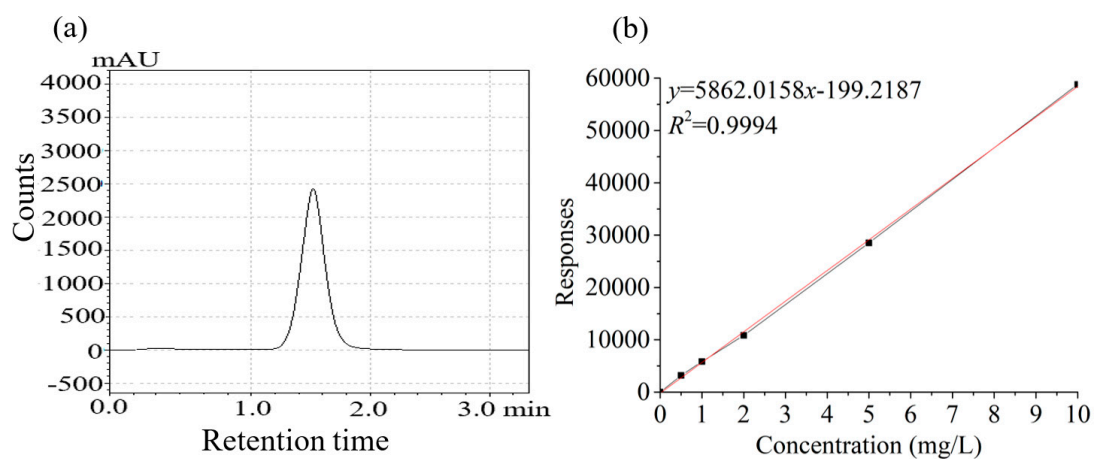

**Figure S4.** The chromatogram of carbendazim standard solution (a). the relationship between peak area and the concentration of carbendazim standard solution (b). Chromatographic conditions: mobile phase, Ammonium acetate.

**Table S1.** model results by PLS of the original data and spectral data pretreated with MSC.

| Pretreatment methods | Principal components | Variables | Calibration set |               | Prediction set |               | RPD   |
|----------------------|----------------------|-----------|-----------------|---------------|----------------|---------------|-------|
|                      |                      |           | $R_c$           | $RMSEC(mg/L)$ | $R_p$          | $RMSEP(mg/L)$ |       |
| Original data        | 8                    | 1416      | 0.9452          | 0.626         | 0.9683         | 0.505         | 2.741 |
| MSC                  | 8                    | 1416      | 0.9854          | 0.35          | 0.9829         | 0.346         | 3.710 |
